# Supplementary material for: Quantum chemical studies on nucleophilic sites in calcium ion bound zwitterionic calmodulin loops
Source: Royal Society of Chemistry journal article supplement (doi:10.1039/c6ra10846f), 2016-01-01
Supplement: c6ra10846f1.pdf [file c6ra10846f1.pdf]

# Electronic supplementary information

## Quantum chemical studies on nucleophilic sites in calcium ion bound Zwitterionic calmodulin loops

**Samapan Sikdar\*, Mahua Ghosh\*&, Molly De Raychaudhury<sup>§</sup> and J. Chakrabarti\* #&**

\* Department of Chemical, Biological And Macromolecular Sciences, S. N. Bose National Centre for Basic Sciences, Sector III, Block JD, Salt Lake, Kolkata 700106, INDIA

<sup>§</sup> Department of Physics, West Bengal State University, Barasat, Kolkata 700126, INDIA

# Also at Unit of Nanoscience and Technology-II and The Thematic Unit of Excellence on Computational Materials Science, S. N. Bose National Centre for Basic Sciences, Sector III, Block JD, Salt Lake, Kolkata 700106, INDIA

& **Corresponding authors:** [jaydeb@bose.res.in](mailto:jaydeb@bose.res.in); [mahuaghosh@bose.res.in](mailto:mahuaghosh@bose.res.in)

### **Supplementary Information:**

Supplementary Tables S1-S5

Supplementary Figure S1 and S2

**Table S1.** Significant contributions of atoms; D22  $O_1$  (Loop 1); D58  $O_1$  and  $O_2$  (Loop 2); Y99  $O_h$  (Loop 3); Y138  $O_h$  (Loop 4) to HOMO<sup>-</sup> of different loops, showing predominant 2p character.

|                         | 2p <sub>x</sub> | 2p <sub>y</sub> | 2p <sub>z</sub> |
|-------------------------|-----------------|-----------------|-----------------|
| $C_{III,D22,O2}^{(2)}$  | 0.006           | 0.029           | 0.124           |
| $C_{III,D58,O1}^{(2)}$  | 0.023           | 0.034           | 0.016           |
| $C_{III,D58,O2}^{(2)}$  | 0.009           | 0.038           | 0.020           |
| $C_{VII,Y99,O_h}^{(2)}$ | 0.010           | 0.082           | 0.005           |
| $C_{X,Y138,O_h}^{(2)}$  | 0.011           | 0.036           | 0.027           |

**Table S2.** Significant contributions of atoms; N60  $O_1$  (Loop 2); S101  $C$  (Loop 3) and N137  $O_1$  (Loop 4) to LUMO<sup>+</sup> of different loops indicating 2p character.

|                        | 2p <sub>x</sub> | 2p <sub>y</sub> | 2p <sub>z</sub> |
|------------------------|-----------------|-----------------|-----------------|
| $C_{V,N60,O1}^{(2)}$   | 0.014           | 0.064           | 0.004           |
| $C_{IX,S101,C}^{(2)}$  | 0.014           | 0.082           | 0.069           |
| $C_{IX,N137,O1}^{(2)}$ | 0.001           | 0.000           | 0.025           |

**Table S3.** Nucleophilic index,  $f_k^-$  of atoms contributing to HOMO<sup>-</sup> of different loops.

| <i>ATOMS</i>                  | $f_k^- \times 10^3$ |
|-------------------------------|---------------------|
| D22, O1 (loop 1)              | -7                  |
| D22, O2 (loop 1)              | 9                   |
| D58, O1 (loop 2)              | 1                   |
| D58, O2 (loop 2)              | -2                  |
| Y99, O <sub>h</sub> (loop 3)  | -55                 |
| Y138, O <sub>h</sub> (loop 4) | -0.8                |

**Table S4.** Electrophilic index,  $f_k^+$  of atoms contributing to LUMO<sup>+</sup> of different loops.

| <i>ATOMS</i>                   | $f_k^+ \times 10^3$ |
|--------------------------------|---------------------|
| T26, O <sub>γ</sub> (loop 1)   | -1                  |
| N60, O1 (loop 2)               | 2                   |
| Y99, C <sub>δ1</sub> (loop 3)  | -95                 |
| Y99, C <sub>ε1</sub> (loop 3)  | -78                 |
| Y99, C <sub>δ2</sub> (loop 3)  | -92                 |
| Y138, C <sub>δ1</sub> (loop 4) | -56                 |
| Y138, C <sub>γ</sub> (loop 4)  | -73                 |

**Table S5.** HOMO<sup>-</sup> ( $E^-$ ), LUMO<sup>+</sup> ( $E^+$ ) and corresponding energy gap  $\Delta$  (in eV) of a different conformation of Ca<sup>2+</sup> bound loop 3 and loop 4 generated from MD simulation.

| <i>loop</i> | $E^-$ (eV) | $E^+$ (eV) | $\Delta$ (eV) |
|-------------|------------|------------|---------------|
| 3           | -5.90      | 0.48       | 6.38          |
| 4           | -5.73      | 0.24       | 5.97          |

### Supplementary Figure Captions:

**Fig. S1.** Exponential decay of terminal capping contributions with decay constants: (a)  $\xi_{C-ter}^{(L2)} = 0.3$  eV, (b)  $\xi_{N-ter}^{(L2)} = 0.01$  eV for loop 2. (c)  $\xi_{C-ter}^{(L3)} = 0.5$  eV, (d)  $\xi_{N-ter}^{(L3)} = 0.01$  eV for loop 3. (e)  $\xi_{C-ter}^{(L4)} = 0.01$  eV and (f)  $\xi_{N-ter}^{(L4)} = 0.03$  eV for loop 4.

**Fig. S2.** Zwitterionic terminal capping contributions,  $C_{N-ter}^{(2)}$  (black) and  $C_{C-ter}^{(2)}$  (gray) of (a) Ca<sup>2+</sup>-loop 3 and (b) Ca<sup>2+</sup>-loop 4 with respect to the HOMO-LUMO levels of neutral capped systems (red) indicating closing of HOMO-LUMO gap.

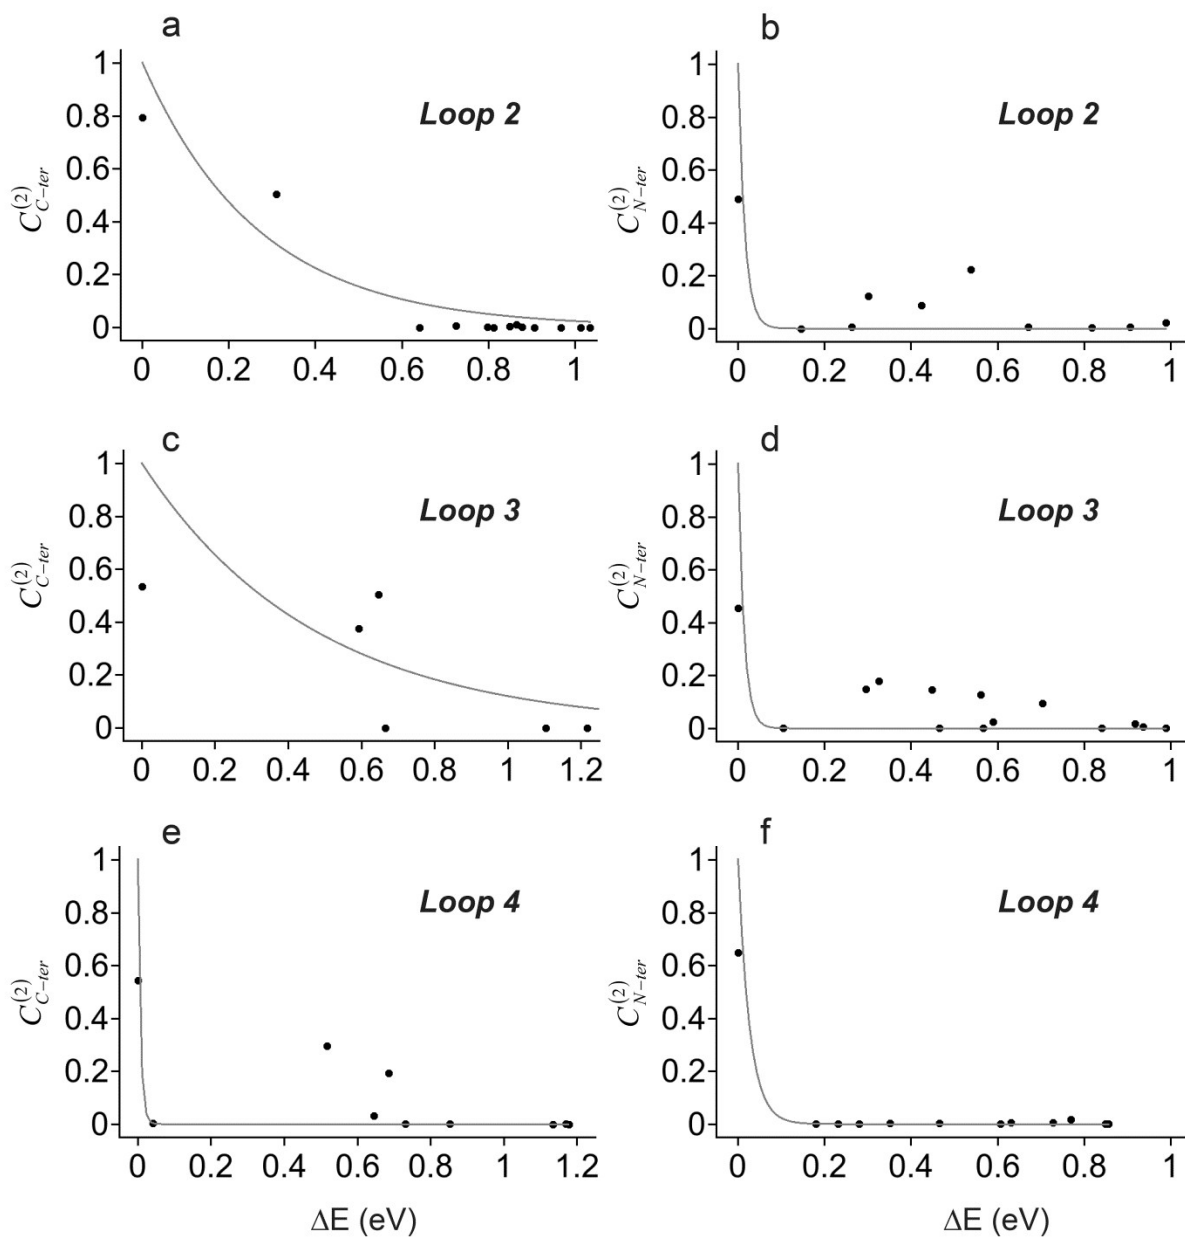

Fig. S1

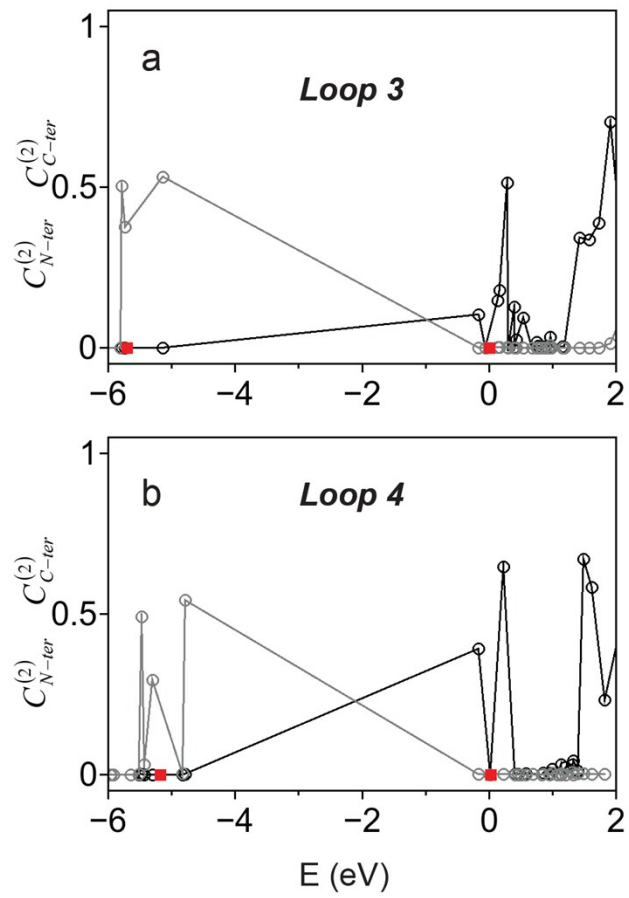

Fig. S2
